# Supplementary material
Source: publisher figshare collection journal article supplement (https://sage.figshare.com/ndownloader/files/41115552)
Supplement: Supplementary file 1 [file 41115552]

**Appendix Table 1: NTPS Response Rates by University**

| <b>NC University</b> | <b>Employment Rate</b> | <b>Survey Responses</b> | <b>Traditional Response Rate</b> | <b>Adjusted Response Rate</b> | <b>Quality Prep Mean &amp; SD</b> | <b>Opportunities to Learn Mean &amp; SD</b> |
|----------------------|------------------------|-------------------------|----------------------------------|-------------------------------|-----------------------------------|---------------------------------------------|
| University 1         | 70.34                  | 52                      | 37.41                            | 26.31                         | 4.12 (0.65)                       | 3.63 (0.79)                                 |
| University 2         | 71.06                  | 519                     | 46.67                            | 33.16                         | 3.96 (0.66)                       | 3.44 (0.64)                                 |
| University 3         | 78.03                  | 75                      | 52.82                            | 41.21                         | 3.93 (0.61)                       | 3.54 (0.52)                                 |
| University 4         | 73.75                  | 26                      | 56.52                            | 41.68                         | 3.97 (0.71)                       | 3.59 (0.69)                                 |
| University 5         | 60.87                  | 24                      | 64.86                            | 39.48                         | 4.11 (0.47)                       | 3.53 (0.67)                                 |
| University 6         | 41.38                  | 6                       | 50.00                            | 20.69                         | 4.11 (0.79)                       | 3.35 (0.77)                                 |
| University 7         | 64.64                  | 79                      | 49.38                            | 31.92                         | 3.97 (0.65)                       | 3.38 (0.62)                                 |
| University 8         | 66.36                  | 35                      | 53.03                            | 35.19                         | 3.99 (0.56)                       | 3.63 (0.62)                                 |
| University 9         | 39.29                  | 8                       | 57.14                            | 22.45                         | 4.04 (0.56)                       | 3.59 (0.80)                                 |
| University 10        | 59.46                  | 12                      | 27.27                            | 16.21                         | 4.36 (0.51)                       | 4.07 (0.65)                                 |
| University 11        | 72.36                  | 535                     | 46.56                            | 33.69                         | 4.05 (0.63)                       | 3.58 (0.64)                                 |
| University 12        | 65.52                  | 72                      | 62.07                            | 40.67                         | 3.92 (0.78)                       | 3.40 (0.82)                                 |
| University 13        | 46.67                  | 46                      | 50.55                            | 23.59                         | 4.32 (0.48)                       | 3.84 (0.45)                                 |
| University 14        | 60.59                  | 59                      | 46.83                            | 28.37                         | 4.08 (0.83)                       | 3.45 (0.71)                                 |
| University 15        | 62.92                  | 40                      | 46.51                            | 29.26                         | 3.94 (0.69)                       | 3.41 (0.81)                                 |
| University 16        | 67.21                  | 24                      | 40.00                            | 26.88                         | 4.06 (0.74)                       | 3.67 (0.70)                                 |
| University 17        | 68.42                  | 13                      | 37.14                            | 25.41                         | 4.09 (0.62)                       | 3.60 (0.52)                                 |
| University 18        | 42.22                  | 43                      | 44.33                            | 18.72                         | 4.12 (0.63)                       | 3.56 (0.71)                                 |
| University 19        | 61.96                  | 37                      | 38.14                            | 23.63                         | 4.17 (0.61)                       | 3.65 (0.59)                                 |
| University 20        | 66.99                  | 42                      | 50.60                            | 33.90                         | 4.19 (0.51)                       | 3.68 (0.57)                                 |
| University 21        | 57.03                  | 39                      | 43.33                            | 24.71                         | 3.98 (0.61)                       | 3.51 (0.67)                                 |
| University 22        | 86.08                  | 90                      | 53.25                            | 45.84                         | 4.53 (0.51)                       | 4.05 (0.62)                                 |
| University 23        | 51.22                  | 19                      | 65.51                            | 33.55                         | 4.30 (0.48)                       | 3.88 (0.65)                                 |
| University 24        | 77.01                  | 28                      | 47.46                            | 36.55                         | 3.91 (0.69)                       | 3.48 (0.76)                                 |
| University 25        | 63.29                  | 48                      | 39.34                            | 24.89                         | 4.04 (0.58)                       | 3.55 (0.72)                                 |
| University 26        | 60.00                  | 4                       | 20.00                            | 12.00                         | 4.25 (0.42)                       | 3.24 (0.87)                                 |
| University 27        | 72.73                  | 16                      | 55.17                            | 40.13                         | 4.09 (0.73)                       | 3.63 (0.64)                                 |
| University 28        | 69.48                  | 101                     | 44.69                            | 31.05                         | 3.86 (0.67)                       | 3.26 (0.65)                                 |
| University 29        | 70.93                  | 31                      | 52.54                            | 37.27                         | 4.06 (0.65)                       | 3.60 (0.66)                                 |
| University 30        | 83.33                  | 41                      | 44.09                            | 36.74                         | 3.99 (0.64)                       | 3.56 (0.72)                                 |
| University 31        | 80.38                  | 35                      | 42.68                            | 34.31                         | 3.90 (0.79)                       | 3.33 (0.63)                                 |
| University 32        | 62.96                  | 9                       | 50.00                            | 31.48                         | 3.97 (0.80)                       | 3.46 (0.51)                                 |
| University 33        | 66.48                  | 278                     | 45.13                            | 30.00                         | 3.92 (0.62)                       | 3.38 (0.64)                                 |
| University 34        | 68.38                  | 120                     | 45.28                            | 30.96                         | 3.77 (0.58)                       | 3.43 (0.56)                                 |
| University 35        | 75.06                  | 429                     | 43.33                            | 32.52                         | 3.89 (0.68)                       | 3.39 (0.62)                                 |
| University 36        | 72.96                  | 300                     | 41.10                            | 29.99                         | 4.02 (0.66)                       | 3.50 (0.64)                                 |
| University 37        | 43.01                  | 18                      | 43.90                            | 18.88                         | 4.38 (0.44)                       | 3.77 (0.58)                                 |
| University 38        | 65.48                  | 194                     | 37.96                            | 24.86                         | 3.80 (0.62)                       | 3.34 (0.68)                                 |
| University 39        | 69.91                  | 269                     | 39.39                            | 27.54                         | 3.89 (0.69)                       | 3.48 (0.68)                                 |
| University 40        | 73.58                  | 34                      | 41.46                            | 30.51                         | 4.20 (0.68)                       | 3.58 (0.66)                                 |
| University 41        | 64.39                  | 28                      | 33.74                            | 21.73                         | 4.31 (0.51)                       | 3.71 (0.59)                                 |

Note: This table displays one-year employment rates, the number of survey responses, and survey response rates for each North Carolina TPP. Traditional response rates represent the number of respondents divided by the total number of first-year teachers who received the NTPS. Adjusted response rates multiply the traditional response rate by the one-year employment rate. For each TPP, this table also displays descriptive data (mean and standard deviation) for the summary measures for Quality of Teacher Preparation and Opportunities to Learn.

**Appendix Table 2: Factor Loadings for NTPS Items**

| NTPS Items                                                                                                    | Factor 1    | Factor 2    | Factor 3    |
|---------------------------------------------------------------------------------------------------------------|-------------|-------------|-------------|
| <b><i>Perceptions of Teacher Preparation Quality</i></b>                                                      |             |             |             |
| Collaborate with colleagues to improve student learning                                                       | <b>0.42</b> | <b>0.56</b> | 0.24        |
| Set challenging and appropriate goals for student learning and performance                                    | <b>0.44</b> | <b>0.62</b> | 0.29        |
| Empower students to become self-directed and productive learners                                              | 0.35        | <b>0.67</b> | 0.34        |
| Maintain discipline and an orderly, purposeful learning environment                                           | 0.22        | <b>0.64</b> | 0.42        |
| Work with parents and families to better understand students and to support their learning                    | 0.23        | <b>0.47</b> | <b>0.55</b> |
| Develop positive and supportive relationships with students                                                   | 0.30        | <b>0.76</b> | 0.24        |
| Create an environment of high expectations for all students                                                   | 0.39        | <b>0.72</b> | 0.25        |
| Teach in ways that support English language learners                                                          | 0.22        | 0.24        | <b>0.75</b> |
| Teach in ways that support students with diverse ethnic, racial, cultural, and socioeconomic backgrounds      | 0.30        | 0.34        | <b>0.66</b> |
| Teach in ways that support special education students                                                         | 0.18        | 0.24        | <b>0.76</b> |
| Teach in ways that support academically gifted students                                                       | 0.32        | 0.25        | <b>0.65</b> |
| Develop a classroom environment that promotes respect and group responsibility                                | 0.35        | <b>0.70</b> | 0.31        |
| Teach the concepts, knowledge, and skills of your discipline                                                  | <b>0.70</b> | 0.34        | 0.07        |
| Align instruction with state standards                                                                        | <b>0.73</b> | 0.29        | 0.03        |
| Relate classroom teaching to the real world                                                                   | <b>0.67</b> | 0.39        | 0.24        |
| Use knowledge of student learning and curriculum to plan instruction                                          | <b>0.69</b> | 0.38        | 0.23        |
| Develop a variety of assessments                                                                              | <b>0.70</b> | 0.26        | 0.33        |
| Provide purposeful feedback to students to guide their learning                                               | <b>0.68</b> | 0.29        | 0.36        |
| Differentiate instruction                                                                                     | <b>0.57</b> | 0.29        | <b>0.51</b> |
| Use technology in the classroom to improve learning outcomes                                                  | <b>0.59</b> | 0.21        | 0.38        |
| Help students think critically to solve problems                                                              | <b>0.65</b> | 0.31        | 0.37        |
| Develop students' questioning and discussion skills                                                           | <b>0.64</b> | 0.33        | <b>0.41</b> |
| Analyze student performance data                                                                              | <b>0.68</b> | 0.22        | <b>0.40</b> |
| Adapt practice based on research and student performance data                                                 | <b>0.65</b> | 0.24        | <b>0.45</b> |
| <b><i>Opportunities to Learn</i></b>                                                                          |             |             |             |
| Study stages of child development and learning                                                                | 0.14        | <b>0.47</b> | 0.36        |
| Develop strategies for managing student behavior                                                              | 0.18        | <b>0.83</b> | 0.30        |
| Develop strategies for establishing classroom procedures                                                      | 0.30        | <b>0.81</b> | 0.23        |
| Develop strategies for teaching English language learners                                                     | 0.11        | 0.25        | <b>0.67</b> |
| Develop strategies for teaching students from diverse racial, ethnic, cultural, and socioeconomic backgrounds | 0.26        | 0.26        | <b>0.66</b> |
| Develop strategies for teaching students with special needs                                                   | 0.08        | 0.13        | <b>0.78</b> |
| Develop strategies for teaching students who are academically gifted                                          | 0.27        | 0.22        | <b>0.65</b> |
| Develop strategies for teaching students of varying ability                                                   | 0.35        | 0.22        | <b>0.70</b> |
| Apply state or national standards to instruction                                                              | <b>0.77</b> | 0.15        | 0.07        |
| Plan units and lessons                                                                                        | <b>0.80</b> | 0.19        | 0.03        |
| Create formative and summative student assessments                                                            | <b>0.81</b> | 0.12        | 0.22        |
| Analyze student assessment data/work to adjust instruction                                                    | <b>0.71</b> | 0.16        | 0.38        |
| Provide meaningful and specific academic feedback to students                                                 | <b>0.66</b> | 0.22        | <b>0.43</b> |
| Develop instructional strategies to promote students' critical thinking skills                                | <b>0.68</b> | 0.21        | <b>0.41</b> |

Note: This table displays factor loadings from exploratory factor analysis on the Perceptions of Teacher Preparation Quality and Opportunities to Learn sections of the NTPS. All factor loadings of 0.40 or above are bolded. We label the three factors as *Instruction* (factor 1), *Supportive Learning Environments* (factor 2), and *Teaching Diverse Learners* (factor 3).

**Appendix Table 3: Unique Teacher Counts in Models**

|                                                                    | <b>Quality of Teacher Preparation</b> |                                     | <b>Opportunities to Learn</b>       |                                     |
|--------------------------------------------------------------------|---------------------------------------|-------------------------------------|-------------------------------------|-------------------------------------|
|                                                                    | <b>1<sup>st</sup> Year Teachers</b>   | <b>2<sup>nd</sup> Year Teachers</b> | <b>1<sup>st</sup> Year Teachers</b> | <b>2<sup>nd</sup> Year Teachers</b> |
| <b><i>Completer-Level Measures: Teacher Value-Added</i></b>        |                                       |                                     |                                     |                                     |
| Rich Covariate Adjustment (OLS)                                    | 2236                                  | 2449                                | 1570                                | 1796                                |
| School Fixed Effect                                                | 1537                                  | 1718                                | 925                                 | 1081                                |
| <b><i>Completer-Level Measures: Teacher Evaluation Ratings</i></b> |                                       |                                     |                                     |                                     |
| Rich Covariate Adjustment (OLS)                                    | 3235                                  | 3193                                | 2320                                | 2316                                |
| School Fixed Effect                                                | 2545                                  | 2501                                | 1591                                | 1573                                |
| <b><i>Completer-Level Measures: Teacher Retention</i></b>          |                                       |                                     |                                     |                                     |
| Rich Covariate Adjustment (OLS)                                    | 3453                                  | 3453                                | 2509                                | 2509                                |
| School Fixed Effect                                                | 2765                                  | 2765                                | 1776                                | 1776                                |

Note: This table displays counts of unique teachers contributing to completer-level analyses of value-added estimates, evaluation ratings, and retention. We provide counts from rich covariate adjustment (OLS) and school fixed effect models.

**Appendix Table 4: Results from Models Excluding Classroom and School Covariates**

|                                                                    | <b>Quality of Teacher Preparation</b> |                                     | <b>Opportunities to Learn</b>       |                                     |
|--------------------------------------------------------------------|---------------------------------------|-------------------------------------|-------------------------------------|-------------------------------------|
|                                                                    | <b>1<sup>st</sup> Year Teachers</b>   | <b>2<sup>nd</sup> Year Teachers</b> | <b>1<sup>st</sup> Year Teachers</b> | <b>2<sup>nd</sup> Year Teachers</b> |
| <i><b>Completer-Level Measures: Teacher Value-Added</b></i>        |                                       |                                     |                                     |                                     |
| Summary Response                                                   | 0.029<br>(0.020)                      | 0.012<br>(0.020)                    | 0.036<br>(0.024)                    | 0.010<br>(0.023)                    |
| Instruction                                                        | 0.015<br>(0.019)                      | -0.011<br>(0.020)                   | 0.026<br>(0.024)                    | 0.003<br>(0.023)                    |
| Supportive Learning Environment                                    | <b>0.050*</b><br>(0.019)              | <b>0.049*</b><br>(0.020)            | <b>0.080**</b><br>(0.023)           | <b>0.065**</b><br>(0.023)           |
| Teaching Diverse Learners                                          | -0.008<br>(0.019)                     | -0.014<br>(0.018)                   | -0.019<br>(0.023)                   | -0.030<br>(0.022)                   |
| Observation Count                                                  | 3,147                                 | 3,361                               | 2,239                               | 2,484                               |
| <i><b>Completer-Level Measures: Teacher Evaluation Ratings</b></i> |                                       |                                     |                                     |                                     |
| Summary Response                                                   | <b>0.064**</b><br>(0.013)             | <b>0.056**</b><br>(0.014)           | <b>0.060**</b><br>(0.016)           | <b>0.051**</b><br>(0.015)           |
| Instruction                                                        | <b>0.021<sup>+</sup></b><br>(0.013)   | 0.022<br>(0.014)                    | 0.018<br>(0.015)                    | 0.016<br>(0.015)                    |
| Supportive Learning Environment                                    | <b>0.065**</b><br>(0.013)             | <b>0.067**</b><br>(0.014)           | <b>0.042**</b><br>(0.015)           | <b>0.071**</b><br>(0.016)           |
| Teaching Diverse Learners                                          | <b>0.031*</b><br>(0.012)              | 0.011<br>(0.014)                    | <b>0.049**</b><br>(0.015)           | 0.019<br>(0.016)                    |
| Observation Count                                                  | 3,235                                 | 3,159                               | 2,320                               | 2,316                               |
| <i><b>Completer-Level Measures: Teacher Retention</b></i>          |                                       |                                     |                                     |                                     |
| Summary Response                                                   | <b>0.009*</b><br>(0.005)              | <b>0.016*</b><br>(0.006)            | <b>0.010*</b><br>(0.005)            | 0.008<br>(0.007)                    |
| Instruction                                                        | 0.006<br>(0.005)                      | 0.010<br>(0.006)                    | 0.006<br>(0.005)                    | 0.002<br>(0.007)                    |
| Supportive Learning Environment                                    | 0.005<br>(0.005)                      | 0.006<br>(0.007)                    | <b>0.011<sup>+</sup></b><br>(0.005) | <b>0.015*</b><br>(0.008)            |
| Teaching Diverse Learners                                          | 0.006<br>(0.005)                      | <b>0.012<sup>+</sup></b><br>(0.006) | 0.002<br>(0.005)                    | -0.001<br>(0.007)                   |
| Observation Count                                                  | 3,453                                 | 3,453                               | 2,509                               | 2,509                               |

Note: This table displays results from models assessing whether perceptions of TPPs predict the EVAAS estimates, NCEES evaluation ratings, and retention of first-year teachers and second-year teachers. Models exclude classroom and school covariates. Standard errors clustered at the teacher-level are in parentheses. +, \*, and \*\* indicate statistical significance at the 0.10, 0.05, and 0.01 levels, respectively.

**Appendix Table 5: Do Completer Perceptions of TPPs Predict Teacher Outcomes? University Fixed Effect Models**

|                                                             | Quality of Teacher Preparation       |                                      | Opportunities to Learn               |                                      |
|-------------------------------------------------------------|--------------------------------------|--------------------------------------|--------------------------------------|--------------------------------------|
|                                                             | 1 <sup>st</sup> Year Teachers        | 2 <sup>nd</sup> Year Teachers        | 1 <sup>st</sup> Year Teachers        | 2 <sup>nd</sup> Year Teachers        |
| <i>Completer-Level Measures: Teacher Value-Added</i>        |                                      |                                      |                                      |                                      |
| Summary Response                                            | 0.018<br>(0.020)                     | 0.012<br>(0.020)                     | 0.024<br>(0.025)                     | 0.003<br>(0.024)                     |
| Instruction                                                 | 0.009<br>(0.019)                     | -0.010<br>(0.020)                    | 0.018<br>(0.025)                     | -0.007<br>(0.024)                    |
| Supportive Learning Environment                             | <b>0.036<sup>+</sup></b><br>(0.019)  | <b>0.047<sup>*</sup></b><br>(0.021)  | <b>0.069<sup>**</sup></b><br>(0.024) | <b>0.063<sup>**</sup></b><br>(0.024) |
| Teaching Diverse Learners                                   | -0.008<br>(0.019)                    | -0.013<br>(0.019)                    | -0.024<br>(0.025)                    | -0.031<br>(0.023)                    |
| Observation Count                                           | 3,147                                | 3,361                                | 2,239                                | 2,484                                |
| <i>Completer-Level Measures: Teacher Evaluation Ratings</i> |                                      |                                      |                                      |                                      |
| Summary Response                                            | <b>0.058<sup>**</sup></b><br>(0.013) | <b>0.052<sup>**</sup></b><br>(0.014) | <b>0.049<sup>**</sup></b><br>(0.016) | <b>0.042<sup>**</sup></b><br>(0.016) |
| Instruction                                                 | <b>0.022<sup>+</sup></b><br>(0.013)  | <b>0.026<sup>+</sup></b><br>(0.014)  | 0.015<br>(0.015)                     | 0.015<br>(0.016)                     |
| Supportive Learning Environment                             | <b>0.057<sup>**</sup></b><br>(0.013) | <b>0.061<sup>**</sup></b><br>(0.014) | <b>0.042<sup>**</sup></b><br>(0.015) | <b>0.067<sup>**</sup></b><br>(0.017) |
| Teaching Diverse Learners                                   | <b>0.025<sup>*</sup></b><br>(0.012)  | 0.006<br>(0.014)                     | <b>0.035<sup>*</sup></b><br>(0.015)  | 0.008<br>(0.017)                     |
| Observation Count                                           | 3,235                                | 3,159                                | 2,320                                | 2,316                                |
| <i>Completer-Level Measures: Teacher Retention</i>          |                                      |                                      |                                      |                                      |
| Summary Response                                            | <b>0.011<sup>*</sup></b><br>(0.005)  | <b>0.016<sup>*</sup></b><br>(0.007)  | <b>0.010<sup>+</sup></b><br>(0.005)  | 0.009<br>(0.007)                     |
| Instruction                                                 | 0.007<br>(0.005)                     | 0.010<br>(0.007)                     | 0.005<br>(0.005)                     | 0.000<br>(0.007)                     |
| Supportive Learning Environment                             | 0.005<br>(0.005)                     | 0.006<br>(0.007)                     | <b>0.011<sup>*</sup></b><br>(0.006)  | <b>0.019<sup>*</sup></b><br>(0.008)  |
| Teaching Diverse Learners                                   | 0.007<br>(0.005)                     | <b>0.012<sup>+</sup></b><br>(0.006)  | 0.003<br>(0.005)                     | 0.000<br>(0.007)                     |
| Observation Count                                           | 3,453                                | 3,453                                | 2,509                                | 2,509                                |

Note: This table displays results from models assessing whether perceptions of TPPs predict the EVAAS estimates, NCEES evaluation ratings, and retention of first-year teachers and second-year teachers. All models include a university fixed effect. Standard errors clustered at the teacher-level are in parentheses. +, \*, and \*\* indicate statistical significance at the 0.10, 0.05, and 0.01 levels, respectively.

**Appendix Table 6: Perceptions of Teacher Preparation Quality and Teacher Outcomes**

| <b>NTPS Items—Teacher Preparation Quality</b>                                                            | <b>Value-Added</b>        | <b>Evaluation Ratings</b> | <b>Retention</b>          |
|----------------------------------------------------------------------------------------------------------|---------------------------|---------------------------|---------------------------|
| Collaborate with colleagues to improve student learning                                                  | 0.004<br>(0.023)          | <b>0.041**</b><br>(0.015) | 0.006<br>(0.005)          |
| Set challenging and appropriate goals for student learning and performance                               | <b>0.048*</b><br>(0.023)  | <b>0.080**</b><br>(0.015) | 0.006<br>(0.006)          |
| Empower students to become self-directed and productive learners                                         | <b>0.063**</b><br>(0.022) | <b>0.074**</b><br>(0.014) | 0.001<br>(0.006)          |
| Maintain discipline and an orderly, purposeful learning environment                                      | <b>0.063**</b><br>(0.019) | <b>0.061**</b><br>(0.013) | <b>0.011*</b><br>(0.005)  |
| Work with parents and families to better understand students and to support their learning               | 0.000<br>(0.019)          | <b>0.041**</b><br>(0.012) | <b>0.010*</b><br>(0.004)  |
| Develop positive and supportive relationships with students                                              | 0.031<br>(0.024)          | <b>0.072**</b><br>(0.016) | 0.005<br>(0.006)          |
| Create an environment of high expectations for all students                                              | 0.026<br>(0.026)          | <b>0.065**</b><br>(0.016) | 0.010<br>(0.006)          |
| Teach in ways that support English language learners                                                     | -0.005<br>(0.018)         | <b>0.028*</b><br>(0.012)  | 0.003<br>(0.004)          |
| Teach in ways that support students with diverse ethnic, racial, cultural, and socioeconomic backgrounds | 0.019<br>(0.021)          | <b>0.053**</b><br>(0.013) | 0.007<br>(0.005)          |
| Teach in ways that support special education students                                                    | -0.001<br>(0.019)         | <b>0.034**</b><br>(0.012) | <b>0.009+</b><br>(0.005)  |
| Teach in ways that support academically gifted students                                                  | 0.013<br>(0.019)          | <b>0.050**</b><br>(0.012) | <b>0.009+</b><br>(0.005)  |
| Develop a classroom environment that promotes respect and group responsibility                           | <b>0.041+</b><br>(0.023)  | <b>0.062**</b><br>(0.016) | <b>0.020**</b><br>(0.006) |
| Teach the concepts, knowledge, and skills of your discipline                                             | 0.022<br>(0.025)          | <b>0.050**</b><br>(0.017) | 0.006<br>(0.006)          |
| Align instruction with state standards                                                                   | 0.025<br>(0.024)          | <b>0.035*</b><br>(0.015)  | 0.009<br>(0.006)          |
| Relate classroom teaching to the real world                                                              | 0.013<br>(0.022)          | <b>0.054**</b><br>(0.015) | 0.005<br>(0.006)          |
| Use knowledge of student learning and curriculum to plan instruction                                     | 0.035<br>(0.024)          | <b>0.054**</b><br>(0.016) | <b>0.014*</b><br>(0.006)  |
| Develop a variety of assessments                                                                         | 0.029<br>(0.021)          | <b>0.057**</b><br>(0.014) | <b>0.011*</b><br>(0.005)  |
| Provide purposeful feedback to students to guide their learning                                          | 0.030<br>(0.021)          | <b>0.048**</b><br>(0.014) | <b>0.010+</b><br>(0.005)  |
| Differentiate instruction                                                                                | 0.021<br>(0.022)          | <b>0.043**</b><br>(0.014) | 0.006<br>(0.005)          |
| Use technology in the classroom to improve learning outcomes                                             | 0.010<br>(0.021)          | 0.012<br>(0.014)          | <b>0.009+</b><br>(0.005)  |
| Help students think critically to solve problems                                                         | 0.030<br>(0.022)          | <b>0.052**</b><br>(0.014) | <b>0.010+</b><br>(0.006)  |
| Develop students' questioning and discussion skills                                                      | 0.017<br>(0.023)          | <b>0.051**</b><br>(0.014) | 0.006<br>(0.005)          |
| Analyze student performance data                                                                         | 0.027<br>(0.021)          | <b>0.045**</b><br>(0.014) | 0.008<br>(0.005)          |
| Adapt practice based on research and student performance data                                            | 0.015<br>(0.020)          | <b>0.053**</b><br>(0.014) | <b>0.010*</b><br>(0.005)  |

Note: This table displays results from models assessing whether perceptions of TPP quality predict the EVAAS estimates, NCEES evaluation ratings, and retention of first-year teachers. Each survey item is entered into a separate regression model. Standard errors clustered at the teacher-level are in parentheses. +, \*, and \*\* indicate statistical significance at the 0.10, 0.05, and 0.01 levels, respectively.

**Appendix Table 7: Opportunities to Learn and Teacher Outcomes**

| <b>NTPS Items—Opportunities to Learn</b>                                                                      | <b>Value-Added</b>        | <b>Evaluation Ratings</b> | <b>Retention</b>          |
|---------------------------------------------------------------------------------------------------------------|---------------------------|---------------------------|---------------------------|
| Study stages of child development and learning                                                                | -0.032<br>(0.026)         | 0.017<br>(0.016)          | -0.000<br>(0.006)         |
| Develop strategies for managing student behavior                                                              | <b>0.079**</b><br>(0.026) | <b>0.063**</b><br>(0.017) | <b>0.018**</b><br>(0.006) |
| Develop strategies for establishing classroom procedures                                                      | <b>0.086**</b><br>(0.025) | <b>0.057**</b><br>(0.016) | <b>0.012*</b><br>(0.006)  |
| Develop strategies for teaching English language learners                                                     | 0.004<br>(0.023)          | <b>0.031*</b><br>(0.015)  | 0.008<br>(0.005)          |
| Develop strategies for teaching students from diverse racial, ethnic, cultural, and socioeconomic backgrounds | <b>0.061*</b><br>(0.025)  | <b>0.048**</b><br>(0.016) | -0.001<br>(0.005)         |
| Develop strategies for teaching students with special needs                                                   | -0.004<br>(0.024)         | <b>0.041**</b><br>(0.015) | <b>0.010*</b><br>(0.005)  |
| Develop strategies for teaching students who are academically gifted                                          | -0.023<br>(0.024)         | <b>0.037*</b><br>(0.015)  | 0.005<br>(0.005)          |
| Develop strategies for teaching students of varying ability                                                   | 0.015<br>(0.027)          | <b>0.046**</b><br>(0.016) | 0.004<br>(0.005)          |
| Apply state or national standards to instruction                                                              | <b>0.051+</b><br>(0.026)  | 0.012<br>(0.016)          | 0.002<br>(0.005)          |
| Plan units and lessons                                                                                        | 0.030<br>(0.027)          | 0.008<br>(0.018)          | 0.007<br>(0.006)          |
| Create formative and summative student assessments                                                            | 0.031<br>(0.025)          | <b>0.044**</b><br>(0.016) | <b>0.009+</b><br>(0.005)  |
| Analyze student assessment data/work to adjust instruction                                                    | 0.012<br>(0.024)          | <b>0.047**</b><br>(0.015) | <b>0.011*</b><br>(0.005)  |
| Provide meaningful and specific academic feedback to students                                                 | 0.024<br>(0.025)          | <b>0.047**</b><br>(0.015) | 0.007<br>(0.005)          |
| Develop instructional strategies to promote students' critical thinking skills                                | 0.021<br>(0.024)          | <b>0.037*</b><br>(0.017)  | <b>0.013*</b><br>(0.005)  |

Note: This table displays results from models assessing whether perceptions of opportunities to learn in TPPs predict the EVAAS estimates, NCEES evaluation ratings, and retention of first-year teachers. Each survey item is entered into a separate regression model. Standard errors clustered at the teacher-level are in parentheses. +, \*, and \*\* indicate statistical significance at the 0.10, 0.05, and 0.01 levels, respectively.

**Appendix Table 8: Results by Response Rate**

|                                                                         | Quality of Teacher Preparation      |                                      | Opportunities to Learn               |                                      |
|-------------------------------------------------------------------------|-------------------------------------|--------------------------------------|--------------------------------------|--------------------------------------|
|                                                                         | <i>Response Rates<br/>≥ 45%</i>     | <i>Response Rates<br/>&lt; 45 %</i>  | <i>Response Rates<br/>≥ 45%</i>      | <i>Response<br/>Rates &lt; 45 %</i>  |
| <b><i>Teacher Value-Added (1<sup>st</sup> Year Teachers)</i></b>        |                                     |                                      |                                      |                                      |
| Summary Response                                                        | 0.037<br>(0.027)                    | 0.022<br>(0.029)                     | 0.023<br>(0.032)                     | 0.047<br>(0.036)                     |
| Instruction                                                             | 0.027<br>(0.025)                    | 0.004<br>(0.030)                     | 0.032<br>(0.033)                     | 0.037<br>(0.038)                     |
| Supportive Learning Environments                                        | <b>0.047<sup>+</sup></b><br>(0.026) | <b>0.054<sup>+</sup></b><br>(0.028)  | <b>0.091<sup>**</sup></b><br>(0.030) | 0.052<br>(0.038)                     |
| Teaching Diverse Learners                                               | -0.007<br>(0.025)                   | -0.009<br>(0.031)                    | -0.043<br>(0.029)                    | 0.002<br>(0.039)                     |
| Observation Count                                                       | 1,786                               | 1,361                                | 1,276                                | 963                                  |
| <b><i>Teacher Evaluation Ratings (1<sup>st</sup> Year Teachers)</i></b> |                                     |                                      |                                      |                                      |
| Summary Response                                                        | <b>0.027<sup>+</sup></b><br>(0.016) | <b>0.098<sup>**</sup></b><br>(0.019) | 0.026<br>(0.022)                     | <b>0.090<sup>**</sup></b><br>(0.021) |
| Instruction                                                             | 0.006<br>(0.016)                    | <b>0.032<sup>+</sup></b><br>(0.019)  | -0.019<br>(0.020)                    | <b>0.058<sup>*</sup></b><br>(0.023)  |
| Supportive Learning Environments                                        | <b>0.031<sup>+</sup></b><br>(0.016) | <b>0.094<sup>**</sup></b><br>(0.019) | 0.022<br>(0.019)                     | <b>0.068<sup>**</sup></b><br>(0.022) |
| Teaching Diverse Learners                                               | 0.013<br>(0.016)                    | <b>0.049<sup>**</sup></b><br>(0.019) | <b>0.043<sup>*</sup></b><br>(0.020)  | <b>0.039<sup>+</sup></b><br>(0.022)  |
| Observation Count                                                       | 1,825                               | 1,410                                | 1,304                                | 1,016                                |
| <b><i>Teacher Retention (Return for a 2<sup>nd</sup> Year)</i></b>      |                                     |                                      |                                      |                                      |
| Summary Response                                                        | 0.007<br>(0.007)                    | 0.011<br>(0.007)                     | 0.010<br>(0.007)                     | 0.012<br>(0.008)                     |
| Instruction                                                             | 0.006<br>(0.006)                    | 0.003<br>(0.007)                     | 0.007<br>(0.006)                     | 0.003<br>(0.008)                     |
| Supportive Learning Environments                                        | 0.007<br>(0.007)                    | 0.003<br>(0.008)                     | 0.003<br>(0.006)                     | 0.005<br>(0.010)                     |
| Teaching Diverse Learners                                               | -0.000<br>(0.006)                   | <b>0.015<sup>+</sup></b><br>(0.008)  | 0.007<br>(0.007)                     | <b>0.015<sup>+</sup></b><br>(0.009)  |
| Observation Count                                                       | 1,943                               | 1,510                                | 1,404                                | 1,105                                |

Note: This table displays results from models assessing whether perceptions of TPPs predict the EVAAS estimates, NCEES evaluation ratings, and retention of first-year teachers. Separate models are run for completers of preparation programs with response rates less than 45 percent and greater than/equal to 45 percent. These analyses focus on completer-level survey measures. Standard errors clustered at the teacher-level are in parentheses. +, \*, and \*\* indicate statistical significance at the 0.10, 0.05, and 0.01 levels, respectively.
